# Supplementary material for: Molecular Dissection of Crz1 and Its Dynamic Subcellular Localization in Cryptococcus neoformans
Source: MDPI journal article supplement (doi:10.3390/jof9020252), 2023-02-14
Supplement: s1 [file s1]

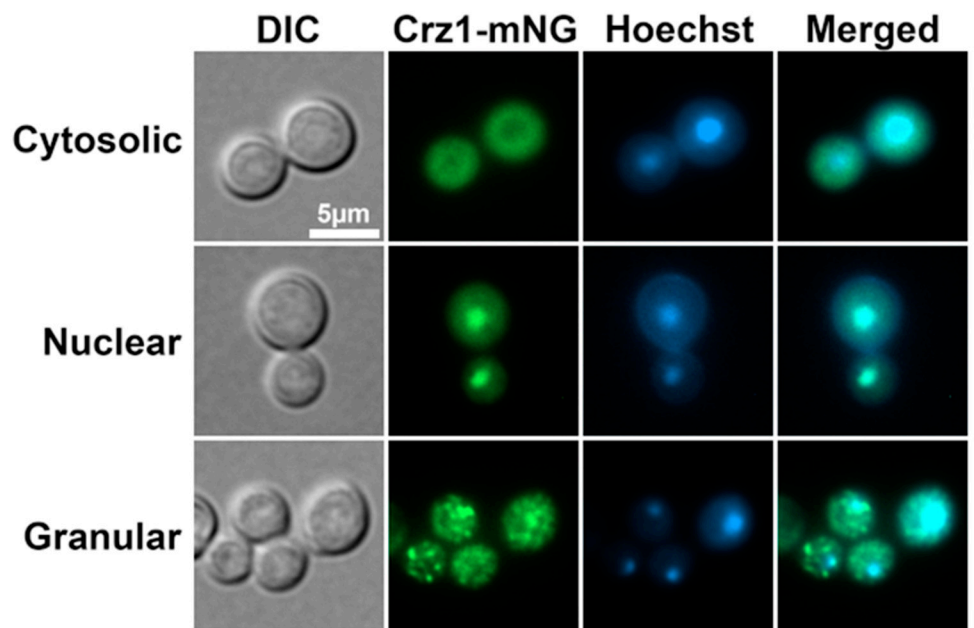

**Supplementary Figure S1.** Crz1 cytosolic, nuclear, and granular localization. Cells expressing Crz1-mNG were cultured overnight at 22°C in liquid YPD. To induce cytosolic localization of Crz1, FK506 was added to cells 30 minutes before preparing for microscopy, at a concentration of 1µg/ml. To induce nuclear or granular localization, the cells were washed and resuspended in water containing 100mM CaCl<sub>2</sub> or 1M NaCl, respectively. To visualize the nucleus, Hoechst dye was added to a final concentration of 10µg/ml. After incubation in the dark for 15 minutes, cells were washed with water and prepared on slides for microscopy. The scale is the same for all images in the panel.
