# Supplementary material for: Molecular Dissection of Crz1 and Its Dynamic Subcellular Localization in Cryptococcus neoformans
Source: MDPI journal article supplement (doi:10.3390/jof9020252), 2023-02-14
Supplement: s1 [file s1]

**Supplemental Table S1. Strains, plasmids, and primers used**

| <b><i>C. neoformans</i> strain name</b> | <b>Identifier</b>                                                                                         | <b>Reference</b>                  |
|-----------------------------------------|-----------------------------------------------------------------------------------------------------------|-----------------------------------|
| H99α                                    | H99α                                                                                                      | (Nielsen et al., 2003)            |
| crz1Δ                                   | H99α, <i>CRZ1::NAT<sup>r</sup></i>                                                                        | FGSC deletion set Plate 5 Well A7 |
| BC402                                   | H99α, <i>CRZ1::NAT<sup>r</sup></i> , <i>P<sub>GPD1</sub>-CRZ1-mNeonGreen-NEO<sup>r</sup></i>              | This Study                        |
| XX510                                   | H99α, <i>CRZ1::NAT<sup>r</sup></i> , <i>P<sub>GPD1</sub>-mCherry-CRZ1-NEO<sup>r</sup></i>                 | (Xu et al., 2017)                 |
| BC948                                   | H99α, <i>CRZ1::NAT<sup>r</sup></i> , <i>P<sub>GPD1</sub>-CRZ1(7S → A)-mNeonGreen-NEO<sup>r</sup></i>      | This Study                        |
| BC979                                   | H99α, <i>CRZ1::NAT<sup>r</sup></i> , <i>P<sub>GPD1</sub>-CRZ1(polyQ → A)-mNeonGreen-NEO<sup>r</sup></i>   | This Study                        |
| BC982                                   | H99α, <i>CRZ1::NAT<sup>r</sup></i> , <i>P<sub>GPD1</sub>-CRZ1(ΔN 1-257)-mNeonGreen-NEO<sup>r</sup></i>    | This Study                        |
| BC1212                                  | H99α, <i>CRZ1::NAT<sup>r</sup></i> , <i>P<sub>GPD1</sub>-CRZ1(ΔN 833-926)-mNeonGreen-NEO<sup>r</sup></i>  | This Study                        |
| BC1245                                  | H99α, <i>CRZ1::NAT<sup>r</sup></i> , <i>P<sub>GPD1</sub>-CRZ1(ΔN 625-665)-mNeonGreen-NEO<sup>r</sup></i>  | This Study                        |
| BC1249                                  | H99α, <i>CRZ1::NAT<sup>r</sup></i> , <i>P<sub>GPD1</sub>-CRZ1(ΔN 946-1030)-mNeonGreen-NEO<sup>r</sup></i> | This Study                        |
| BC1252                                  | H99α, <i>CRZ1::NAT<sup>r</sup></i> , <i>P<sub>GPD1</sub>-CRZ1(ΔN 1-802)-mNeonGreen-NEO<sup>r</sup></i>    | This Study                        |
| BC1256                                  | H99α, <i>CRZ1::NAT<sup>r</sup></i> , <i>P<sub>GPD1</sub>-CRZ1(ΔN 1-451)-mNeonGreen-NEO<sup>r</sup></i>    | This Study                        |
| BC1258                                  | H99α, <i>CRZ1::NAT<sup>r</sup></i> , <i>P<sub>GPD1</sub>-CRZ1(ΔN 1-705)-mNeonGreen-NEO<sup>r</sup></i>    | This Study                        |
| BC1259                                  | H99α, <i>CRZ1::NAT<sup>r</sup></i> , <i>P<sub>GPD1</sub>-CRZ1(ΔN 1-823)-mNeonGreen-NEO<sup>r</sup></i>    | This Study                        |
| BC1273                                  | H99α, <i>CRZ1::NAT<sup>r</sup></i> , <i>P<sub>GPD1</sub>-CRZ1(ΔN 1-368)-mNeonGreen-NEO<sup>r</sup></i>    | This Study                        |
| BC1310                                  | H99α, <i>CRZ1::NAT<sup>r</sup></i> , <i>P<sub>GPD1</sub>-CRZ1(ΔN 263-451)-mNeonGreen-NEO<sup>r</sup></i>  | This Study                        |
| <b>Plasmid name</b>                     | <b>Identifier</b>                                                                                         | <b>Reference</b>                  |
| pXL1-mCherry- <i>CRZ1</i>               | <i>P<sub>GPD1</sub>-mCherry-CRZ1-NEO<sup>r</sup></i>                                                      | (Xu et al., 2017)                 |
| pUC19- <i>CRZ1</i> -mNeonGreen          | <i>P<sub>GPD1</sub>-CRZ1-mNeonGreen-NEO<sup>r</sup></i>                                                   | This Study                        |
| LKB39                                   | <i>P<sub>H3</sub>-GFP-CNA1-NAT<sup>r</sup></i>                                                            | (Kozubowski et al., 2011)         |

|                    |                                                         |                                           |
|--------------------|---------------------------------------------------------|-------------------------------------------|
| LKB61              | P <sub>GPD1</sub> -mCherry- <i>CNA1-HYG<sup>r</sup></i> | (Kozubowski <i>et al.</i> , 2011)         |
| LKB88              | P <sub>GPD1</sub> -mCherry- <i>PUB1-HYG<sup>r</sup></i> | (Kozubowski <i>et al.</i> , 2011)         |
| <b>Primer name</b> | <b>Sequence (5' -&gt; 3')</b>                           | <b>Purpose</b>                            |
| linlab3397/XX      | taatggccggccatggcagatccagcctcacc                        | Cloning WT <i>CRZ1</i> open reading frame |
| linlab3398/XX      | taatgcatcgcatcctcttcactcgtttcactcttc                    | Cloning WT <i>CRZ1</i> open reading frame |
| Linlab7530/BC      | agcggcagcggcagcggcagcggcagcggcagctgggtggctgaccctcacttgc | Generate polyQ mutant                     |
| Linlab7953/BC      | tgtcctggtgagtcaccctgtggtcaagaatgtgctatcaca              | Generate DBD mutant                       |
| Linlab7954/BC      | acagggtgactcaccaggaca                                   | Generate DBD mutant                       |
| Linlab7761/BC      | cacttctgtcgctacgctggtgcaagaactcggcgctg                  | Generate Δ833-926 mutant                  |
| Linlab7762/BC      | cagcgtagcgacagaagtg                                     | Generate Δ833-926 mutant                  |
| Linlab7765/BC      | ataggccggccggcttcacagttaaccaaacg                        | Generate Δ1-257 mutant                    |
| Linlab7955/BC      | ataggccggccatgaccaaccctaactctccc                        | Generate Δ1-368 mutant                    |
| Linlab7956/BC      | ataggccggccatgggcaggggactatttgacgc                      | Generate Δ1-451 mutant                    |
| Linlab7959/BC      | ataggccggccatggggttatatcctcatgcg                        | Generate Δ1-705 mutant                    |
| Linlab7957/BC      | ataggccggccgctggtggttcaacgtgag                          | Generate Δ1-823 mutant                    |
| Linlab7961/BC      | caatcaaatgggatggaggatatgatctgtatccagcccagt              | Generate Δ263-451 mutant                  |

|               |                                        |                                |
|---------------|----------------------------------------|--------------------------------|
| Linlab7958/BC | atcctccatcccatttgattg                  | Generate<br>Δ263-451<br>mutant |
| Linlab7962/BC | gttgagctcgccttctcc                     | Generate<br>Δ625-665<br>mutant |
| Linlab7963/BC | ggagaaggcgagctcaactgcatcagctcactcaatta | Generate<br>Δ625-665<br>mutant |

- Kozubowski, L., Aboobakar, E.F., Cardenas, M.E., and Heitman, J. (2011). Calcineurin colocalizes with P-bodies and stress granules during thermal stress in *Cryptococcus neoformans*. *Eukaryot Cell* *10*, 1396-1402. 10.1128/ec.05087-11.
- Nielsen, K., Cox, G.M., Wang, P., Toffaletti, D.L., Perfect, J.R., and Heitman, J. (2003). Sexual cycle of *Cryptococcus neoformans* var. *grubii* and virulence of congenic  $\alpha$  and  $\alpha$  isolates. *Infection and immunity* *71*, 4831-4841. 10.1128/iai.71.9.4831-4841.2003.
- Xu, X., Lin, J., Zhao, Y., Kirkman, E., So, Y.-S., Bahn, Y.-S., and Lin, X. (2017). Glucosamine stimulates pheromone-independent dimorphic transition in *Cryptococcus neoformans* by promoting Crz1 nuclear translocation. *PLOS Genetics* *13*, e1006982. 10.1371/journal.pgen.1006982.
